# Supplementary material for: Utility of patient-derived xenografts to evaluate drug sensitivity and select optimal treatments for individual non-small-cell lung cancer patients
Source: PubMed Central journal article supplement (PMC11556205; doi:10.1186/s10020-024-00934-4), 2024-11-11
Supplement: 10020_2024_934_MOESM1_ESM.pdf [file 10020_2024_934_MOESM1_ESM.pdf]

**Osimertinib-sensitive PDX primary cell**

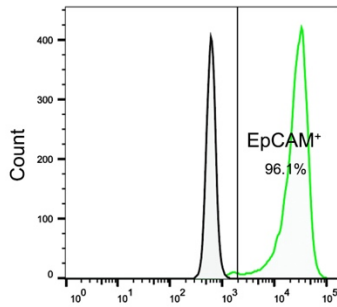

**Osimertinib-resistant PDX primary cell**

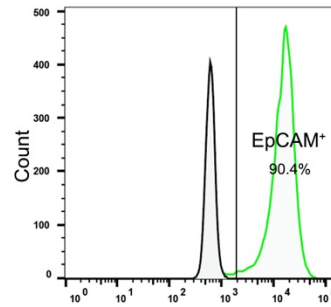

**Figure S1.** Establishment of patient-derived cells. Primary cultures were stained with matching isotype control (black curve) or FITC-conjugated human EpCAM antibody (green curve) and analyzed by flow cytometry. The x-axis shows fluorescence intensity and the y-axis shows the number of stained cells. A proportion of EpCAM-expressing cells were >80% in cases.

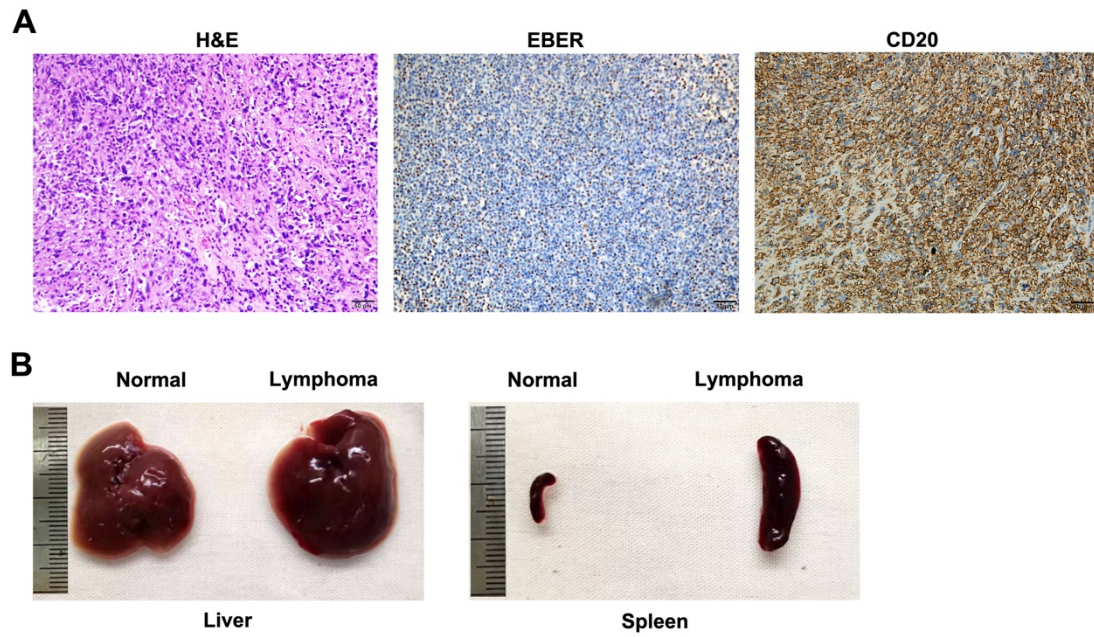

**Figure S2.** Representative histology of lymphoma transformed PDX tumors. (A) Representative images of H&E and EBER-ISH and IHC staining for CD20 in PDX tissues. Scale bars, 50  $\mu$ m. (B) Comparison of liver and spleen between normal mice and lymphoma mice.

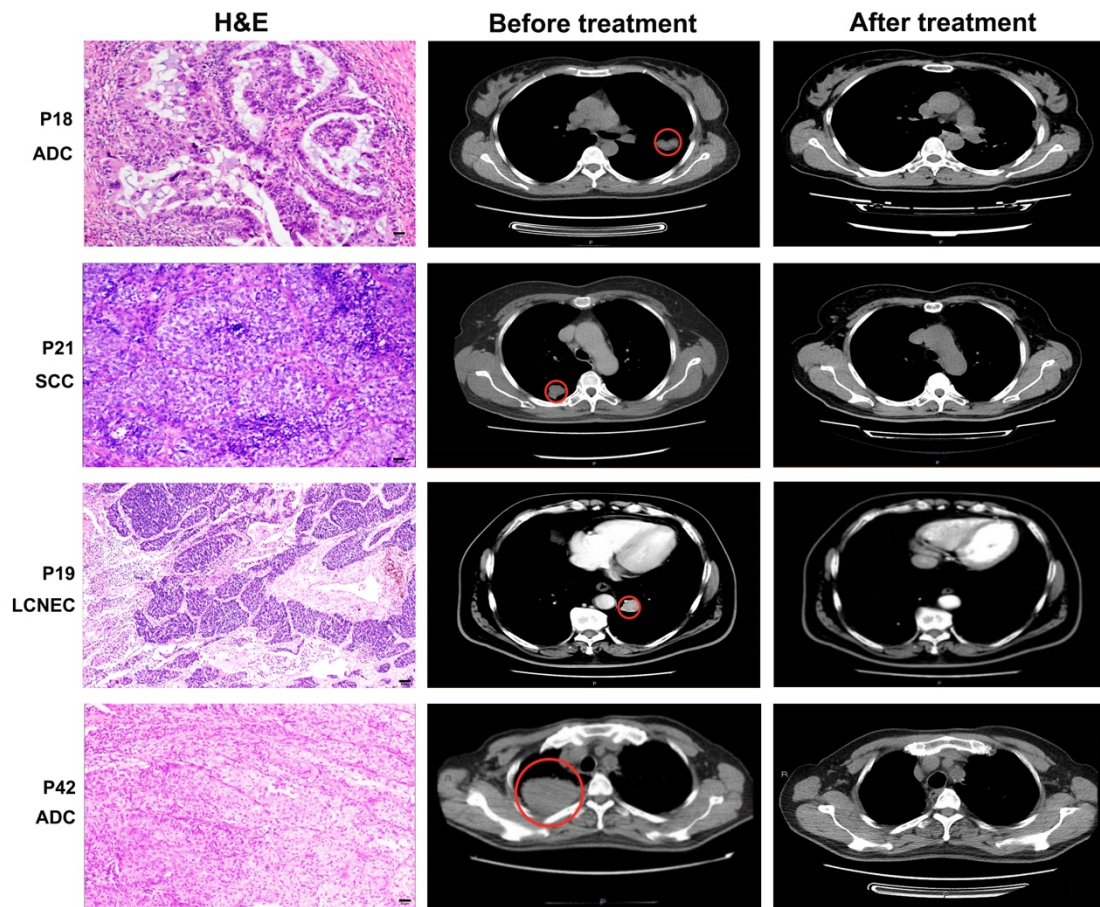

**Figure S3.** The histopathologic features and clinical responses of selected patients.

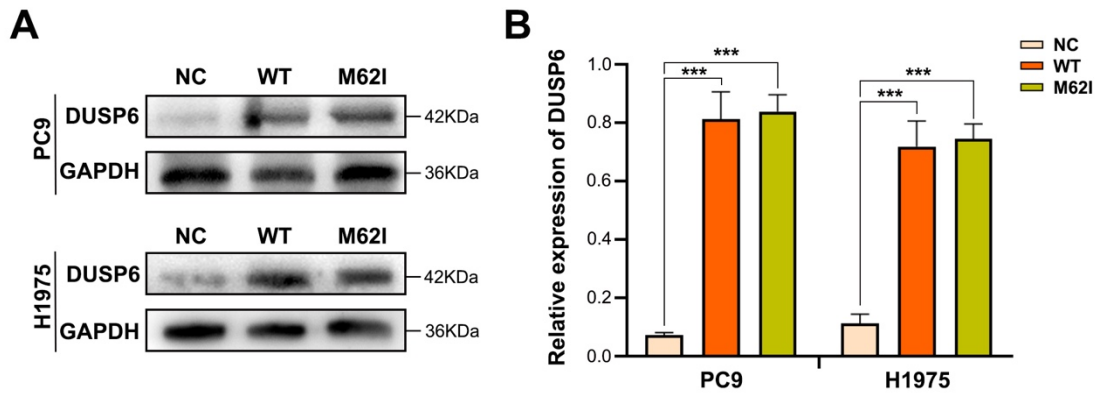

**Figure S4.** The protein levels of DUSP6 were assessed using immunoblot analysis. (A) Representative Western blot showing DUSP6 expression in PC9 and H1975 cell. (B) Quantification of DUSP6 expression levels normalized to GAPDH. The Western blot detection were performed with three technical replicates. Comparisons between two groups were evaluated by Student's t-test. \*\*\* $P < 0.001$

**Table S1. Clinical and pathological characteristics of 62 NSCLC patients**

| Patient ID | Sex    | Age (years) | Smoking habits | Histology | TNM     | Stage | Site | Tumor size (cm3) | Metastasis | Driver oncogene status                       | Engraftment success |
|------------|--------|-------------|----------------|-----------|---------|-------|------|------------------|------------|----------------------------------------------|---------------------|
| Patient#1  | Female | 50          | No             | ADC       | T2N3M1  | IVA   | LLL  | 13.50            | Yes        | ALK <sup>+</sup>                             | Yes                 |
| Patient#2  | Female | 55          | No             | ADC       | T1cN0M0 | I A3  | LUL  | 1.51             | No         | N/A                                          | No                  |
| Patient#3  | Female | 64          | No             | SCC       | T1bN0M0 | I A2  | RLL  | 1.52             | No         | WT                                           | Yes                 |
| Patient#4  | Male   | 58          | No             | ADC       | T2bN0M0 | II A  | RLL  | 3.56             | No         | EGFR exon 20 ins                             | No                  |
| Patient#5  | Female | 78          | No             | ADC       | T1cN2M0 | IIIA  | RLL  | 4.05             | Yes        | KRAS G13X                                    | No                  |
| Patient#6  | Female | 69          | No             | ADC       | T2aN0M0 | I B   | LUL  | 4.86             | No         | EGFR exon 21 L858R                           | No                  |
| Patient#7  | Female | 59          | No             | ADC       | T1cN1M0 | II B  | LUL  | 5.10             | Yes        | EGFR exon 19 del                             | No                  |
| Patient#8  | Female | 55          | No             | ADC       | T2aN2M0 | IIIA  | RUL  | 5.60             | Yes        | EGFR exon 19 del                             | No                  |
| Patient#9  | Male   | 68          | Yes            | ADC       | T1bN2M0 | IIIA  | RUL  | 5.78             | Yes        | WT                                           | Yes                 |
| Patient#10 | Female | 48          | No             | ADC       | T2aN0M0 | I B   | LUL  | 6.05             | No         | EGFR exon 21 L858R                           | No                  |
| Patient#11 | Male   | 50          | Yes            | ADC       | T1bN0M0 | I A2  | RUL  | 6.30             | No         | KRAS G13X                                    | No                  |
| Patient#12 | Male   | 64          | Yes            | ADC       | T1bNxM0 | II B  | RLL  | 6.58             | Yes        | EGFR exon 19 del                             | No                  |
| Patient#13 | Female | 55          | No             | ADC       | T1cN0M0 | I A3  | LUL  | 7.42             | No         | WT                                           | No                  |
| Patient#14 | Female | 58          | No             | ADC       | T1cN2M0 | IIIA  | LUL  | 7.45             | Yes        | EGFR exon 19 del                             | No                  |
| Patient#15 | Male   | 66          | Yes            | ADC       | T1bN0M0 | I A2  | LUL  | 7.50             | No         | WT                                           | No                  |
| Patient#16 | Female | 74          | No             | ADC       | T1cN0M0 | I A3  | RUL  | 7.84             | No         | MET exon 14 alternative splicing aberrations | No                  |

|            |        |    |     |         |         |      |     |       |     |                    |                     |
|------------|--------|----|-----|---------|---------|------|-----|-------|-----|--------------------|---------------------|
| Patient#17 | Male   | 70 | Yes | ADC+SCC | T1cN0M0 | I A3 | LUL | 9.26  | No  | N/A                | No                  |
| Patient#18 | Female | 69 | No  | ADC     | T2aN2M0 | IIIA | LUL | 12.80 | Yes | KRAS G12C          | Yes                 |
| Patient#19 | male   | 66 | Yes | LCNEC   | T2aN0M0 | I B  | LLL | 13.50 | No  | WT                 | Yes                 |
| Patient#20 | Female | 69 | No  | ADC     | T1cN2M0 | IIIA | RUL | 13.85 | Yes | EGFR exon 21 L858R | No                  |
| Patient#21 | Male   | 58 | Yes | SCC     | T2aN0M0 | I B  | RLL | 14.60 | No  | WT                 | Yes                 |
| Patient#22 | Male   | 69 | Yes | ADC     | T4N0M1a | IVA  | RUL | 15.01 | Yes | EGFR exon 21 L858R | No                  |
| Patient#23 | Male   | 74 | No  | ADC     | T2aN1M0 | II B | RLL | 15.80 | Yes | WT                 | lymphoproliferation |
| Patient#24 | Male   | 53 | Yes | ADC     | T1cN0M0 | I A3 | RUL | 16.30 | No  | EGFR exon 19 del   | No                  |
| Patient#25 | Female | 54 | No  | ADC     | T2aN0M0 | I B  | RLL | 16.30 | No  | EGFR exon 19 del   | No                  |
| Patient#26 | Female | 51 | No  | ADC     | T2aN0M0 | I B  | RLL | 17.36 | No  | N/A                | No                  |
| Patient#27 | Female | 68 | No  | ADC     | T2N2M0  | IIIA | LUL | 18.00 | Yes | EGFR exon 21 L858R | lymphoproliferation |
| Patient#28 | Female | 70 | No  | ADC     | T2aN0M0 | I B  | RML | 18.25 | No  | EGFR exon 21 L858R | No                  |
| Patient#29 | Male   | 71 | No  | ADC     | T2bN0M0 | IIA  | LUL | 19.50 | No  | EGFR exon 19 del   | No                  |
| Patient#30 | Female | 56 | No  | ADC     | T1cN0M0 | I A3 | LLL | 19.60 | No  | EGFR exon 21 L858R | Yes                 |

|            |        |    |     |     |         |       |     |       |     |                    |                     |
|------------|--------|----|-----|-----|---------|-------|-----|-------|-----|--------------------|---------------------|
| Patient#31 | Female | 71 | No  | ADC | T1cN0M0 | I A3  | LUL | 19.72 | No  | EGFR exon 21 L858R | No                  |
| Patient#32 | Female | 73 | No  | ADC | T1cN0M0 | I A3  | RLL | 21.88 | No  | WT                 | No                  |
| Patient#33 | Male   | 72 | Yes | ADC | T2N2M1a | IVA   | RUL | 21.88 | Yes | EGFR exon 21 L858R | lymphoproliferation |
| Patient#34 | Female | 54 | No  | ADC | T2aN0M0 | I B   | LUL | 22.05 | No  | N/A                | No                  |
| Patient#35 | Female | 72 | No  | ADC | T2aN0M0 | I B   | RML | 22.31 | No  | N/A                | No                  |
| Patient#36 | Female | 66 | No  | ADC | T2aN1M0 | II B  | RLL | 22.87 | Yes | EGFR exon 19 del   | No                  |
| Patient#37 | Female | 66 | No  | ADC | T2aN0M0 | I B   | LUL | 24.30 | No  | EGFR exon 19 del   | No                  |
| Patient#38 | Male   | 59 | No  | ADC | T1cN0M0 | I A3  | LUL | 24.70 | No  | WT                 | No                  |
| Patient#39 | Male   | 69 | No  | ADC | T2aN0M0 | I B   | LUL | 25.30 | No  | WT                 | No                  |
| Patient#40 | Female | 65 | No  | ADC | T2aN0M0 | I B   | LUL | 25.40 | No  | EGFR exon 21 L858R | No                  |
| Patient#41 | Male   | 59 | Yes | ADC | T2aN2M0 | III A | LLL | 26.90 | Yes | EGFR exon 18 G719X | No                  |
| Patient#42 | Female | 78 | No  | ADC | T1cN2M0 | III A | RUL | 27.20 | Yes | EGFR exon 21 L858R | Yes                 |
| Patient#43 | Female | 56 | No  | ADC | T1cN0M0 | I A3  | LUL | 27.40 | No  | WT                 | Yes                 |

|            |        |    |     |     |         |      |     |       |     |                    |     |
|------------|--------|----|-----|-----|---------|------|-----|-------|-----|--------------------|-----|
| Patient#44 | Female | 44 | No  | ADC | T4NXM1a | IVA  | LUL | 27.80 | Yes | EGFR exon 19 del   | Yes |
| Patient#45 | Male   | 56 | Yes | SCC | T2bN0M0 | IIA  | LLL | 27.90 | No  | WT                 | No  |
| Patient#46 | Male   | 63 | Yes | SCC | T2aN1M0 | IIB  | LLL | 29.30 | Yes | KRAS G13C          | Yes |
| Patient#47 | Female | 68 | No  | SCC | T3N1M0  | IIIA | RLL | 29.60 | Yes | N/A                | No  |
| Patient#48 | Male   | 60 | No  | ADC | T4N2M0  | IIIB | RLL | 29.74 | Yes | WT                 | No  |
| Patient#49 | Male   | 63 | Yes | SCC | T4N0M0  | IIIA | LUL | 30.34 | No  | WT                 | Yes |
| Patient#50 | Female | 59 | No  | ADC | T2N2M0  | IIIA | LUL | 31.97 | Yes | EGFR exon 21 L858R | Yes |
| Patient#51 | Female | 67 | No  | ADC | T2aN0M0 | I B  | RUL | 36.00 | Yes | WT                 | No  |
| Patient#52 | Female | 58 | No  | ADC | T2aN0M0 | I B  | LLL | 36.20 | No  | WT                 | No  |
| Patient#53 | Male   | 72 | No  | ADC | T2aN0M0 | I B  | RLL | 46.80 | No  | WT                 | No  |
| Patient#54 | Female | 72 | No  | ADC | T1cN0M0 | I A3 | RLL | 47.80 | No  | HER2 exon 20 ins   | No  |
| Patient#55 | Female | 71 | No  | ADC | T2aN0M0 | I B  | RLL | 59.30 | No  | EGFR exon 21 L858R | No  |
| Patient#56 | Female | 61 | No  | ADC | T2aN0M0 | I B  | RLL | 76.10 | No  | EGFR exon 21 L858R | No  |



|            |        |    |     |     |         |       |     |        |     |                    |    |
|------------|--------|----|-----|-----|---------|-------|-----|--------|-----|--------------------|----|
| Patient#57 | Female | 67 | No  | ADC | T1bN0M0 | I A2  | RML | 77.33  | No  | WT                 | No |
| Patient#58 | Female | 65 | No  | ADC | T1cN1M0 | II B  | RLL | 79.30  | Yes | WT                 | No |
| Patient#59 | Female | 79 | No  | ADC | T1bN0M0 | I A2  | LUL | 101.60 | No  | EGFR exon 21 L858R | No |
| Patient#60 | Male   | 66 | Yes | SCC | T3N0M0  | II B  | RLL | 129.60 | No  | WT                 | No |
| Patient#61 | Male   | 48 | Yes | ADC | T1N2M0  | III A | RUL | 217.70 | Yes | EGFR exon 21 L858R | No |
| Patient#62 | Male   | 70 | Yes | ADC | T1cN0M0 | I A3  | RLL | 296.30 | No  | KRAS G13C          | No |

TNM, tumor node metastasis; ADC, adenocarcinoma; SCC, squamous cell carcinoma; LCNEC, Large cell neuroendocrine carcinoma; LUL, left upper lobe; RLL, right lower lobe; RML, right middle lobe; LLL, left lower lobe; RUL, right upper lobe. Driver oncogene: The American Society of Clinical Oncology (ASCO) advocates for routine mutation testing of driver genes, including EGFR, ALK, ROS1, and BRAF, in patients with non-small cell lung cancer (NSCLC). N/A, Not Available.
